# Supplementary material for: A new non-classical fold of varroa odorant-binding proteins reveals a wide open internal cavity
Source: PubMed Central journal article supplement (PMC8222343; doi:10.1038/s41598-021-92604-2), 2021-06-23
Supplement: 41598_2021_92604_MOESM1_ESM.pdf [file 41598_2021_92604_MOESM1_ESM.pdf]

## Supplementary Material

### A new non-classical fold of varroa odorant-binding proteins reveals a wide open internal cavity

Beatrice Amigues<sup>1#</sup>, Jiao Zhu<sup>2,4#</sup>, Anais Gaubert<sup>1</sup>, Simona Arena<sup>3</sup>, Giovanni Renzone<sup>3</sup>, Philippe Leone<sup>1</sup>, Isabella Maria Fischer<sup>2</sup>, Harald Paulsen<sup>4</sup>, Wolfgang Knoll<sup>2,5</sup>, Andrea Scaloni<sup>3</sup>, Alain Roussel<sup>1</sup>, Christian Cambillau<sup>1\*</sup>, Paolo Pelosi<sup>2\*</sup>

<sup>1</sup>*Architecture et Fonction des Macromolécules Biologiques (AFMB, UMR 6098), Centre National de la Recherche Scientifique (CNRS) & Aix-Marseille Université (AMU), Campus de Luminy, Case 932, 13288 Marseille Cedex 09, France*

<sup>2</sup>*Austrian Institute of Technology GmbH, Biosensor Technologies, Konrad-Lorenz Straße, 24, 3430 Tulln, Austria*

<sup>3</sup>*Proteomics & Mass Spectrometry Laboratory, ISPAAM, National Research Council, 80147 Napoli, Italy.*

<sup>4</sup>*Faculty of Biology, Institute of Molecular Physiology, Johannes Gutenberg-Universität, 55099 Mainz, Germany*

<sup>5</sup>*Department of Physics and Chemistry of Materials, Faculty of Medicine/Dental Medicine,*

*Danube Private University, Krems, Austria*

## Supplementary Table S1. Sequences of ticks and mites used for the phylogenetic tree reported in Fig. 1

>VdesOBP1\_XP\_022672530 .1 uncharacterized protein LOC111255133 [Varroa destructor]  
MKVFVIALVGMMAAAPASATPAKVVIEWGKCEQLKPSSEKERTSKAAVVDKCLQSLPLDPEKATQQEIDKHRESVTTTALKAEGWFDDEGVYKFDRARNEIKNKKLDSEVEEAALLKHDACQKEATEKH  
DDYINQVQLYQACMDYNISQICGKVMV

>VdesOBP2\_XP\_022645714 .1 uncharacterized protein LOC111243821 [Varroa destructor]  
MKTFIGLVLVGMAMAAPPASGPEAGKPPTEIEWGKCSQLKPSDSERMTKAAVVEKCVQSLPLPEAGKASQAEIEKHREDVTTTALKAEGWFDKGVYKFDRARDEIKNKKLASDIETPVLEKHAECQKEAGEKH  
TSDYIKQVQLYQACMDFNISQICGKVVV

>VdesOBP3\_XP\_022653293 .1 uncharacterized protein LOC111247029 [Varroa destructor]  
MNAAVYIVTAMLACCCSADTASGDHASDTSQFGKWRCTCLADKLPKAKREVDFEFIKPGGTDMMNKFRRGLNLCVLTSDGLLNKHKVDLKKMSMTAASAGSPELKKAYENCPKDDKNTSEDRSIKCLIDHLEVDC  
LASK

>VdesOBP4\_XP\_022653281 .1 uncharacterized protein LOC111247024 [Varroa destructor]  
MYENRLLHLNGICGGGIQADRCEPAYLPDTPVRIIVKMKTLVVALLASTACLTAADTATGDHQPDSNQFGRWRTCLKSKIPENKQPGMEACINKPGGTDMSKFRRLGCVLESYGIVNNHRVDLTKMRSSASLV  
TSPKAFMECPKDDKNSLDRSIKVIDHLETSCSAVKAQG

>VdesOBP5\_XP\_022666940 .1 uncharacterized protein LOC111252778 [Varroa destructor]  
MHRSFVLQCCGLLFIVGLALAGPLAKDKSERITPKQTVVEFFTSNWGECEPLKNPLVLEISDAATWERCVRHIPLSPDQVEEALPNLSRCMLKVIWVRANGNMNLTKYMDYLSQAGLDDKTLELTKTAHEKC  
SQRALSDGSGDYKEQDKIYVECFRHFDTCPNPFQAAVKQGYIVGITQISFVPRYDEVEVESDTEAEFTEGQAGPSVADATGEEAANDNANGSGGPQ

>Turt\_XP\_015786166 .1 uncharacterized protein LOC107363453 [Tetranychus urticae]  
MKNLQSIITLCLIFGFIVSTVYSQPLGSSDSNPDTQDTKEASTSVNDKSSDQEGSSEDEDAPTPVAGPHRPPTINWGKCPQLEPKAEKKQKADIIRTCLKSITLPENITQESVEKHRTEVAKCALNAENWFA  
EDGSYRYDKAESEIKNKKLQPEIEPQIVNQHSECRKEAEQFPSPGIAQIQLYQACMDYHISMICGIQIVGTGYSQ

>Turt\_XP\_015794342 .1 uncharacterized protein LOC107370892 [Tetranychus urticae]  
MNYLSLCLVFIIFFLTIGFSESARLPRSTSSPATSSSTTTTSSVNNKNEENQPTSSASSSAGSATGGPTINWGRCPQLEPTNEEKIKKAAVITKCLESTPVPVNI TRETVELHREQVAACALRMEGWFNQGG  
LYRFDKAENEIKAKKLTREVEEKVLSFHRQCKDEAEKYPVSSNQLIAQIQLYQACMDYFISEVCGIEVQIAGSEGSSE

>Turt\_XP\_015782945 .1 uncharacterized protein LOC107360741 [Tetranychus urticae]  
MFLISLCLIVLVNSSNCAPQATPNRQGGFSGQLQGGPQPPQINWGKCPQLEPVESDKKAKADIISCLKSIALPENMTQETVEKHRTEVARCALNAENWFTEDGKYRYDKAESEIKAKKLSQEVPEPQILRQHG  
ECRKEAEGQFPSPGIAQIQLYQACMDYHISQICGITIVGSSSQ

>Turt\_XP\_015791022 .1 uncharacterized protein LOC107367785 [Tetranychus urticae]  
MILITLCLVLAINSSYGPQRFLAPQPTSDQLEGSPQGGFPQPPQPPQINWGKCPQLEPKESDKKAKADIISCKISIPLENVTQESIEKHRTEVAICALNAENWFSADMKYRYDKAESEIRAKKLV  
DVEPLVLRQHGECKEAEQFPSPGIAQVQLYQACMDYHISQICGITIVGASSPQ

>Hqin\_AAX37829 .1 Hq05 [Haemaphysalis qinghaiensis]  
MVSLKAVLFCALAFFTCVGSAPAAEPKQPEVNWGKCPQLKPTEEKQQAQVVDQCLDKIPIPDLDTANETVILKHREDVTTTALKTEGWFNKNGHYRFDRAKTEISNKKLPADVQPQVIKHADECKKEAETK  
FPKNFIAQVQLYQACMDHHISQLCGVKIEGDSHGHSAGGKKASA

>Hfla\_AYH64978 .1 immunogenic protein [Haemaphysalis flava]  
MVAFAALFICALALPVYAQNAPAAEPQRPENWGKCPQLQPSKEERQKALVIDTCKLEKVPDPVEHANETVIQHRREDVTTTALHSEGWFNKNGQYRFDRA RTEILNKKLAAEVEPQVLAKHDECKKEAEK  
FAHQFVAQVQLYQACMDYHISQICGIQIQAALPQAGAAPPAGQ

>Hlon\_ADK47399 .1 immunogenic protein [Haemaphysalis longicornis]  
MVAFAALFICALALPVYAQNAPAAEPQRPDINWGKCPQLQPSKEERQKALVIDTCKLEKVPDPVEHANETVIQHRREDVTTTALHSEGWFNKNGQYRFDRA RTEILNKKLAAEVEPQVLAKHDECKKEAEK  
FAHQFVAQVQLYQACMDYHISQICGIQIQAAGAPAGGVPQPPQGG

>Isca\_XP\_002399632 .1 uncharacterized protein LOC8038114 [Ixodes scapularis]  
MVAFAKVSVAVLLCVGSFAFIPAGGKDLDAQAQTQAGVPPRPQINWGKCPQLQPSENERQKALVIDQCLDKVPLPDVDTANDTVIQHRQDVTTTALKTEGWFNNSGQYRFDRA RTEILNKKLAKDVEPQVLSK  
HDECKKEAEKFAKNFVAQVQLYQACMDYHISQICGIQIAQAAEAHPQGAQQG

>Isca\_EEC12103 .1 hypothetical protein IScW\_ISCW008703 [Ixodes scapularis]  
MWTSAKALVTLGLVLLAVGVLGDAGVPDPKTKDKPEKQTIHEFFSSNWGACEPLKNPLVIPMSNPPTTWVKCQKHLPEHPQDIEEYLPRLSRCMLKSTGWVRSNGNMNLSKYLQYLSLLGLDDETMNGTREA  
HKGCIAKAYKEKDYKTQDKVYVECFKFFTKSCSANFQAGVKEGYIVGITQLSFMPRMGPLEVDDVEAEVSEDDAPQDVLPTNSTSTS

>Isca\_XP\_002433530 .1 uncharacterized protein LOC8051706 [Ixodes scapularis]  
MKILLITVVVVCFAATDASRRSTRRQFTDWRNMCMEQLPSEKKPIYDACYNRSRGTDMHFKFREGLKCVLTDYNLLNGTKIDLAAMTTRASSVSGKLGQAFDTCPKDDHNRNAAGVKCIDRLETDCPVPTGS  
TAH

>Gocc\_XP\_003747300 .1 uncharacterized protein LOC100900705 [Galendromus occidentalis]  
MKIFFAVALTILVCEVSADTASGDHTSDDSKFGKWRSLASKLPADKQKVHEDCFKPKPGGTDMSKFRRLGSLVDSYGVVKDVKIDQAKMASTATSITSPKKAFTCEPKDDKNVSEDRTIKCVIDNLETTCK  
LST

>Gocc\_XP\_003742126 .1 uncharacterized protein LOC100907366 [Galendromus occidentalis]  
MNTFSCVLLGVLVAGACAGPIAKDKSERISPKQTVVEFFTSNWGSCEPLKNPLVLEISDASTWERCRAHIPISPEQVEEALPNLSRCMLKVIWVRPNMNL SKYMDYLSQAGLDGKTLELTKIAHEKCSSR  
AFSQAANDYKEQDKIYVECFRHFDTCPNPFQAAVKQGYIVGITQISFVPRYDEVEDEAGPVEEDAEPQQTQEDSNSSIKDSDAQ

>Gocc-2\_XP\_003741537 .1 uncharacterized protein LOC100907454 [Galendromus occidentalis]  
MKVFVLAFAVGLALAAPQAQQGASGGAPKNPIIEWGKCNQLKPSSEKERTSKAAVVDKCLQQLPLDPEKASQAEIDKHRESVTTTALKAEGWFDKGVYKFDRARNEIKNKKLDSEIESQVLVKHDECQKEATE  
KHTDFINQVQLYQACMDYNISQICGKVMV

>Tmer\_OQR79252 .1 hypothetical protein BIW11\_05867 [Tropilaelaps mercedesae]  
MKTLLVIALIAGTACLAADIATGDHQPDTNQFGQWRTCLKSKIPQDKQATMDNVCVKPGGTDMAKFRRGISCVLESYGVVNGHRVDLRLKMGSTASSVRSPELKKAFQCEPKDDKNASLDRSIKVIDHLETSCP  
LVKAQG

>Tmer\_OQR80083 .1 hypothetical protein BIW11\_00054, partial [Tropilaelaps mercedesae]  
VEQFFTSNWGECEPLKNPLVLEISDASTWERCRAHIPITPEQVEEALPNLSRCMLKVIWVRPNMNLTKYMDYLSQAGLDEKTELELTKIAHEKCSQRALSDGAGNYKEQDKIYVECFRHFDTCPNPFQA  
AVKQGYIVGITQISFVPRYDDVEMEVDSDADAEDPNGAYPGPGADDANASSGSSNNNNKDDSNNNKADSNNGAQ

>Tmer\_OQR73552 .1 hypothetical protein BIW11\_09656 [Tropilaelaps mercedesae]

MKVFFVVMALMGMAAPQAPAAPTSAPKAPVIEWGKCDQLKPSNERSTSKAAVVDKCLQSLPLPDPEKATQQEIDKHRESVTTTALKAEGWFDDKGVYKFDRARNEIKNKKLDGEIEAAVLVKHDACQKEATEKH  
EDYINQVQLYQACMDYNISQICGKVMV

>Rann\_ABV53333 .1 unknown larval protein [Rhipicephalus annulatus]  
MVAFKAALILCVLVLPAYAQTAGAEPPRPEINWGKCPQLQPSKEERQQKALVIDTCLKVPPLPDVEHANETVIOQHREDVTTTALHSEGWFNKGQYRFDRARTEILNKKLAADVEPKVLAKHDECKKEAEKEF  
AHQFVAQVQLYQACMDYHISQICGIQIQGGAGAPAHG

>Rsan\_AQP25670 .1 Rs 05br antigen [Rhipicephalus sanguineus]  
MVAFKAALILCVLVLPAYAQTAGAEPPRPEINWGKCPQLQPSKEERQQKALVIDTCLKVPPLPDVEHANETVIOQHREDVTTTALHSEGWFNKGQYRFDRARTEILNKKLAADVEPKVLAKHDECKKEAEKEF  
AHQFVAQVQLYQACMDYHISQICGIQIQGGAGAPAHG

>Ldel\_RWS22631 .1 hypothetical protein B4U80\_07214, partial [Leptotrombidium deliense]  
PPOGQGFHPQQGPPQQGPGGEGPPYGPSPQIYWGRCPOLEPTMDEKVKAAVITKCLETTVPVQNIQESVEVHREQVAACALQMEGWFNDKGLYKYDKAESEIKAKRLSKEIEERILSYHKQCKEEAEF  
KFPVSNKALISQIQLYQACMDYFISDVCGLDVLRR

>Ldel\_RWS28635 -.1 hypothetical protein B4U80\_06376 [Leptotrombidium deliense]  
MLKTVCFLFAIAAVKCCQQPPEAPQVPVQAPPQPPQPRINWGQCPQLEPKESDKAKAKVIQGCLOKIPVPTNITQETIVQHOREVALCALTTEQWFNEQKYRYEKAENEIKRKGLOPVIQTRIVFHHNKC  
QTEAKEKQDVIIQEVQMYQACMDYIIAQICGITVTTQ

>Dtin\_RWS02013 .1 hypothetical protein B4U79\_11820 [Dinotrombium tinctorium]  
MWKTVAIVIFFCVLFVDCQQPQEPKINWGKCSKIEPTEQDKQEKAKVIQGCLOKVPPLPKNVTRESVAHQHREVAVCALNAENWFNEEGKYRYEKAERQIKSKKLEKEIETKILFHHNCKKREAQEKTEIIEVQ  
LYQACMDYIIAQICEITVN

>Dtin\_RWS11187 .1 hypothetical protein B4U79\_15176 [Dinotrombium tinctorium]  
MFHFLLLFCFELIHCAQRNVRLPEVNPSALPQKPSPTPQQLQPLNGQPRNSPQELFQLQPQAPNVRPQDQSAFPSEGNENNRQHHPQPPPPPLPPGPPQISWGQCPQLEPTMEEKIKKAAVITKCLEL  
TPVPTNITRESVELHREQVAACALQMEGWFNEKGTYRFDKAESEIKNKKLQKDIENRVLTYHKQCKEEAEKEFPISQNLIAQIQLYQACMDYFISEVCGIEVGPSAPAEF

>Dpte\_XP\_027195173 .1 GATA zinc finger domain-containing protein 10-like [Dermatophagoides pteronyssinus]  
MFRSIIFTLLLAMMMFIIVDANIPNHYHHQHNSTIKLASSMQPSTQSIPLQASASQQSNTIMNKQQQQQSHSHQHQPTLLTLEQQDLLEQLAQLQRQTQQLLAAQQSLAAVAAAAAVNNNGDANSQTGG  
NIPASGSANIGHLHHHQHQQQPNHAQQFGRQSSINQSNTRSSSSSSSSSNVGHNNKPIQLQNTNGSDGNNNNNSGNNNNNGNSQTTAINNGLPQSPQINWGKCPPELEPSEQEKLAKANVITKCLETTPLPTNIT  
RESVEQHREQIAACALRSEGWFTQQGGYDFSKAEKEIKNKRLEQEDLENQVLNYHSQCRVESEDKYPTSTNSSIIAQIQLYQACMDYFISDVCIEVNDSDVPQF

>Dpte\_XP\_027194279 .1 uncharacterized protein LOC113788996 [Dermatophagoides pteronyssinus]  
MKFSTIFAITLATSSMMMMTMAANKKNKIVAAASEPSTVSVQPADQTPRRPKINWGRCPOLEPTERDIESKSNILQECLELRQNPQQSESITQEIQIQQHQKQVTECALKIENWFDKNGEYKYKAEKEIKNKNL  
AKDMEKLLLESHKQCSQIAKDRSQAVKNMTIVEQVQVYQGCMDAHITQNCQIEISAV

>Ssca\_KPM10909 .1 hypothetical protein QR98\_0094740 [Sarcoptes scabiei]  
MIANMNLALAIILLLAHLCDASTEKLDKSKLQQQQLPQRPKIDWGKCPQLEPSEKDIKSKSNILQRCLKENPPPNQDSITPELIIGHQKNVTECALKIENWFDKKGDKYKFEKAEKEIKNKKLSSEMOKALV  
GSHQDCAEVSKTQKKQSKTPMDVVEQVQIYQGCMDAHITQHCQIKIGA

>SscaOBP\_KPM10930 .1 hypothetical protein QR98\_0094950 [Sarcoptes scabiei]  
MMAIHQLFLTTVASLWSVMLMTAVVALPQPLNTSTNNKPADSISTASSSSIDSNVPLMASASSPSGQNLRSSSQQPMLLTLEQQQELLDQLAQLQRQTQQLLAAQQSLAAVAAAAAVNGNNGVSIPTPLDGNS  
NNDAGSHSPITSGSIQYHRQQNQQTHTPTTQQLNNTSNQSSAAIRNDNIDQGSLEQSQSKSNQLNQMNNNAQNSQSQSMGLPQSPQINWGKCPPELEPSEQEKLAKANVITKCLETTPLPANITRESVEQHRE  
QIAGCALRSEGWFTPNGGYDFSKAEKEIRNKHLQADLENQVLNYHGGQCRVESEEKYPTSNSSIIAQIQLYQACMDYFISDVCIEVNDTDSQF

>Rmay\_OTF72123 -.1 hypothetical protein BLA29\_010316, partial [Euroglyphus maynei]  
QLPRAPKINWGRCPOLEPTQRDIEAKSSILQECLELRQNPQQSESITQEIQIQQREYKYKAEKEIKNKNLAKEMEKVLLLESHKQCSQIAKDRKQAVKNLSNVEQVQIYQGCMDAHITQNCQIQISAV

**Supplementary Table S2. Assigned disulfide bridged-peptides identified in the tryptic/chymotryptic digest of OBP1, OBP2 and OBP5 from *Varroa destructor*.** Reported are the protein under investigation, amino acid sequence, amino acid position within corresponding protein sequence, experimental/theoretical mass value of the observed parent ion, modified cysteine residue, and software used for characterization. § Cysteine involved in disulfide bridge; \* bridged or linear peptide with aspecific cut; # software used for identification.

***Varroa destructor* OBP1**

| Assigned disulfide bridged-peptides                      | Position            | MH <sub>2</sub> <sup>2+</sup><br>(exp./theor.) | MH <sub>3</sub> <sup>3+</sup><br>(exp./theor.) | MH <sub>4</sub> <sup>4+</sup><br>(exp./theor.) | Cys-Cys | MH <sup>+</sup><br>(exp./theor.) | BioPharma<br>Finder <sup>#</sup> | pLink <sup>#</sup> |
|----------------------------------------------------------|---------------------|------------------------------------------------|------------------------------------------------|------------------------------------------------|---------|----------------------------------|----------------------------------|--------------------|
| [C <sup>§</sup> EQL]-[NISQIC <sup>§</sup> GIK]           | (22-25)-(137-145)   | 732.8628/<br>732.8631                          | 488.9112/<br>488.9113                          |                                                | 22-142  | 1464.7179/<br>1464.7184          | x                                | x                  |
| [C <sup>§</sup> EQLK]-[NISQIC <sup>§</sup> GIK]          | (22-26)-(137-145)   | 796.9125/<br>796.9106                          | 531.6109/<br>531.6097                          | 398.9601/<br>398.9592                          | 22-142  | 1592.8172/<br>1592.8134          | x                                | x                  |
| [GKC <sup>§</sup> EQL]-[NISQIC <sup>§</sup> GIK]         | (20-26)-(137-145)   | 825.4242/<br>825.4218                          |                                                |                                                | 22-142  | 1649.8407/<br>1649.8358          | x                                |                    |
| [C <sup>§</sup> EQLKPSESER]-[NISQIC <sup>§</sup> GIK]    | (22-32)-(137-145)   | 1139.5628/<br>1139.5622                        | 760.0444/<br>760.0440                          | 570.2853/<br>570.2850                          | 22-142  | 2278.1177/<br>2278.1165          | x                                | x                  |
| [C <sup>§</sup> EQLKPSESER]-[C <sup>§</sup> GIK]*        | (22-32)-(141-145)   | 918.4556/<br>918.4534                          |                                                |                                                | 22-142  | 1835.9035/<br>1835.8989          | x                                | x                  |
| [C <sup>§</sup> EQLKPSESER]-[NISQIC <sup>§</sup> GI]*    | (22-32)-(137-144)   | 1075.5158/<br>1075.5146                        | 717.3465/<br>717.3457                          |                                                | 22-142  | 2150.0238/<br>2150.0215          |                                  | x                  |
| [C <sup>§</sup> EQLKPSES]-[NISQIC <sup>§</sup> GIK]*     | (22-30)-(137-145)   | 996.9930/<br>996.9903                          |                                                |                                                | 22-142  | 1992.9782/<br>1992.9728          |                                  | x                  |
| [C <sup>§</sup> EQLKPSESER]-[DYNISQIC <sup>§</sup> GIK]* | (22-32)-(135-145)   | 1278.6089/<br>1278.6072                        | 852.7419/<br>852.7408                          |                                                | 22-142  | 2556.2100/<br>2556.2067          | x                                | x                  |
| [C <sup>§</sup> EQLK]-[ISQIC <sup>§</sup> GIK]*          | (22-26)-(138-145)   | 739.8908/<br>739.8892                          |                                                |                                                | 22-142  | 1478.7738/<br>1478.7705          |                                  | x                  |
| [C <sup>§</sup> EQLKPS]-[DYNISQIC <sup>§</sup> GIK]*     | (22-28)-(135-145)   | 1028.0010/<br>1027.9981                        |                                                |                                                | 22-142  | 2054.9941/<br>2054.9884          | x                                | x                  |
| [C <sup>§</sup> EQLKPSESER]-[ISQIC <sup>§</sup> GIK]*    | (22-32)-(138-145)   | 1082.5434/<br>1082.5407                        | 722.0315/<br>722.0297                          |                                                | 22-142  | 2164.0790/<br>2164.0736          | x                                | x                  |
| [C <sup>§</sup> EQLKPS]-[SQIC <sup>§</sup> GIK]*         | (22-28)-(139-145)   | 775.3918/<br>775.3895                          |                                                |                                                | 22-142  | 1549.7758/<br>1549.7712          |                                  | x                  |
| [C <sup>§</sup> EQLKPS]-[NISQIC <sup>§</sup> GIK]*       | (22-28)-(137-145)   | 888.9557/<br>888.9530                          |                                                |                                                | 22-142  | 1776.9036/<br>1776.8982          | x                                | x                  |
| [C <sup>§</sup> EQLK]-[DYNISQIC <sup>§</sup> GIK]*       | (22-26)-(135-145)   | 935.9588/<br>935.9558                          | 624.3085/<br>624.3064                          |                                                | 22-142  | 1870.9099/<br>1870.9037          | x                                | x                  |
| [C <sup>§</sup> EQLKPSESER]-[SQIC <sup>§</sup> GIK]*     | (22-32)-(139-145)   |                                                | 684.3367/<br>684.3350                          |                                                | 22-142  | 2050.9944/<br>2050.9895          | x                                | x                  |
| [C <sup>§</sup> L]-[ESVTTC <sup>§</sup> AL]              | (42-43)-(64-71)     | 528.2432/<br>528.2413                          |                                                |                                                | 42-69   | 1055.4787/<br>1055.4748          | x                                |                    |
| [C <sup>§</sup> LQSLPLPDPEK]-[C <sup>§</sup> ALK]*       | (42-53)-(69-72)     | 885.9632/<br>885.9603                          | 590.9781/<br>590.9761                          |                                                | 42-69   | 1770.9187/<br>1770.9128          | x                                | x                  |
| [C <sup>§</sup> LQ]-[ESVTTC <sup>§</sup> AL]*            | (42-44)-(64-71)     | 592.2726/<br>592.2708                          |                                                |                                                | 42-69   | 1183.5375/<br>1183.5338          | x                                |                    |
| [C <sup>§</sup> LQ]-[C <sup>§</sup> ALK]*                | (42-44)-(69-72)     | 397.6993/<br>397.6988                          |                                                |                                                | 42-69   | 794.3908/<br>794.3899            | x                                | x                  |
| [HDAC <sup>§</sup> QK]-[QAC <sup>§</sup> MDY]            | (109-114)-(131-136) | 714.7718/<br>714.7709                          | 476.8504/<br>476.8499                          |                                                | 112-133 | 1428.5357/<br>1428.5340          | x                                | x                  |
| [HDAC <sup>§</sup> QK]-[Q(pGlu)AC <sup>§</sup> MDY]      | (109-114)-(131-136) | 706.2602/<br>706.2576                          |                                                |                                                | 112-133 | 1411.5125/<br>1411.5075          |                                  | x                  |
| [HDAC <sup>§</sup> QK]-[YQAC <sup>§</sup> MDY]*          | (109-114)-(130-136) | 796.3044/<br>796.3026                          |                                                |                                                | 112-133 | 1591.6010/<br>1591.5973          |                                  | x                  |
| [HDAC <sup>§</sup> QK]-[AC <sup>§</sup> MDY]*            | (109-114)-(132-136) | 650.7428/<br>650.7416                          |                                                |                                                | 112-133 | 1300.4778/<br>1300.4754          |                                  | x                  |

## Varroa destructor OBP2

| Assigned disulfide bridged-peptides                 | Position            | MH <sub>2</sub> <sup>2+</sup><br>(exp./theor.) | MH <sub>3</sub> <sup>3+</sup><br>(exp./theor.) | MH <sub>4</sub> <sup>4+</sup><br>(exp./theor.) | Cys-Cys | MH <sup>+</sup><br>(exp./theor.) | BioPharma<br>Finder# | pLink# |
|-----------------------------------------------------|---------------------|------------------------------------------------|------------------------------------------------|------------------------------------------------|---------|----------------------------------|----------------------|--------|
| [C <sup>S</sup> VQ]-[EDVTTC <sup>S</sup> ALK]*      | (36-38)-(58-66)     | 663.3096/<br>663.3076                          | 442.5423/<br>442.5410                          |                                                | 36-63   | 1325.6113/<br>1325.6075          | x                    | x      |
| [C <sup>S</sup> VQ]-[REDVTTC <sup>S</sup> AL]*      | (36-38)-(57-65)     | 677.3122/<br>677.3107                          |                                                |                                                | 36-63   | 1353.6166/<br>1353.6136          |                      | x      |
| [C <sup>S</sup> VQ]-[HREDVTTC <sup>S</sup> AL]*     | (36-38)-(56-65)     | 745.8427/<br>745.8402                          |                                                |                                                | 36-63   | 1490.6776/<br>1490.6726          |                      | x      |
| [C <sup>S</sup> VQ]-[HREDVTTC <sup>S</sup> ALK]*    | (36-38)-(56-66)     | 809.8926/<br>809.8876                          |                                                |                                                | 36-63   | 1618.7774/<br>1618.7675          |                      | x      |
| [HAEC <sup>S</sup> QK]-[QAC <sup>S</sup> MDF]       | (103-108)-(126-131) | 713.7839/<br>713.7813                          | 476.1919/<br>476.1901                          |                                                | 106-128 | 1426.5600/<br>1426.5548          | x                    | x      |
| [HAEC <sup>S</sup> QK]-[Q(pGlu)AC <sup>S</sup> MDF] | (103-108)-(126-131) | 705.2706/<br>705.2680                          |                                                |                                                | 106-128 | 1409.5334/<br>1409.5282          |                      | x      |

## Varroa destructor OBP5

| Assigned disulfide bridged-peptides                  | Position            | MH <sub>2</sub> <sup>2+</sup><br>(exp./theor.) | MH <sub>3</sub> <sup>3+</sup><br>(exp./theor.) | MH <sub>4</sub> <sup>4+</sup><br>(exp./theor.) | Cys-Cys | MH <sup>+</sup><br>(exp./theor.) | BioPharma<br>Finder# | pLink# |
|------------------------------------------------------|---------------------|------------------------------------------------|------------------------------------------------|------------------------------------------------|---------|----------------------------------|----------------------|--------|
| [TSNWGEC <sup>S</sup> EPLK]-[TC <sup>S</sup> PPNF]   | (23-33)-(144-149)   | 969.9248/<br>969.9219                          | 646.9524/<br>646.9505                          |                                                | 29-145  | 1938.8417/<br>/1938.8360         | x                    | x      |
| [GEC <sup>S</sup> EPLK]-[TC <sup>S</sup> PPNF]       | (27-33)-(144-149)   | 725.8226/<br>725.8209                          | 484.2177/<br>484.2165                          |                                                | 29-145  | 1450.6375/<br>1450.6340          | x                    | x      |
| [FTSNWGEC <sup>S</sup> EPLK]-[TC <sup>S</sup> PPNF]  | (22-33)-(144-149)   | 1043.4600/<br>1043.4561                        | 695.9759/<br>695.9733                          |                                                | 29-145  | 2085.9121/<br>2085.9044          | x                    | x      |
| [TSNWGEC <sup>S</sup> EPL]-[TC <sup>S</sup> PPNF]    | (23-32)-(144-149)   | 905.8768/<br>905.8744                          |                                                |                                                | 29-145  | 1810.7457/<br>1810.7410          | x                    | x      |
| [FTSNWGEC <sup>S</sup> EPL]-[TC <sup>S</sup> PPNF]   | (22-32)-(144-149)   | 979.4106/<br>979.4086                          |                                                |                                                | 29-145  | 1957.8133/<br>1957.8094          | x                    | x      |
| [GEC <sup>S</sup> EPL]-[TC <sup>S</sup> PPNF]        | (27-32)-(144-149)   | 661.7748/<br>661.7734                          |                                                |                                                | 29-145  | 1322.5419/<br>1322.5391          | x                    | x      |
| [TSNWGEC <sup>S</sup> EPLK]-[TC <sup>S</sup> PPNFQ]* | (23-33)-(144-150)   | 1033.9544/<br>1033.9512                        |                                                |                                                | 29-145  | 2066.9010/<br>2066.8945          |                      | x      |
| [NWGEC <sup>S</sup> EPLK]-[TC <sup>S</sup> PPNFQ]*   | (25-33)-(144-150)   | 939.9124/<br>939.9113                          |                                                |                                                | 29-145  | 1878.8171/<br>1878.8148          |                      | x      |
| [GEC <sup>S</sup> EPLK]-[TC <sup>S</sup> PPNFQ]*     | (27-33)-(144-150)   | 789.8514/<br>789.8502                          |                                                |                                                | 29-145  | 1578.6951/<br>1578.6926          | x                    | x      |
| [NWGEC <sup>S</sup> EPLK]-[TC <sup>S</sup> PPNF]*    | (25-33)-(144-149)   | 875.8844/<br>875.8820                          |                                                |                                                | 29-145  | 1750.7610/<br>1750.7563          |                      | x      |
| [C <sup>S</sup> R]-[C <sup>S</sup> MLK]              | (50-51)-(71-74)     | 385.1809/<br>385.1759                          |                                                |                                                | 50-71   | 769.3540/<br>769.3518            | x                    |        |
| [C <sup>S</sup> SQR]-[VECS <sup>S</sup> IF]          | (114-117)-(134-138) | 550.7478/<br>550.7470                          | 367.5011/<br>367.5006                          |                                                | 114-136 | 1100.4878/<br>1100.4863          | x                    | x      |
| [C <sup>S</sup> SQR]-[IYVECS <sup>S</sup> IF]        | (114-117)-(132-138) | 688.8225/<br>688.8208                          | 459.5509/<br>459.5498                          |                                                | 114-136 | 1376.6372/<br>1376.6337          | x                    | x      |
| [C <sup>S</sup> SQR]-[VECS <sup>S</sup> IFR]         | (114-117)-(134-139) | 628.7996/<br>628.7976                          |                                                |                                                | 114-136 | 1256.5913/<br>1256.5874          | x                    | x      |
| [C <sup>S</sup> SQR]-[IYVECS <sup>S</sup> IFR]       | (114-117)-(132-139) |                                                | 511.5853/<br>511.5834                          | 383.9410/<br>383.9395                          | 114-136 | 1532.7404/<br>1532.7347          | x                    | x      |
| [C <sup>S</sup> SQR]-[ECS <sup>S</sup> IF]*          | (114-117)-(135-138) | 501.2140/<br>501.2128                          |                                                |                                                | 114-136 | 1001.4202/<br>1001.4179          | x                    | x      |
| [C <sup>S</sup> SQR]-[ECS <sup>S</sup> IFR]*         | (114-117)-(135-139) | 579.2652/<br>579.2634                          |                                                |                                                | 114-136 | 1157.5227/<br>1157.5190          | x                    | x      |
| [C <sup>S</sup> SQR]-[IYVECS <sup>S</sup> I]*        | (114-117)-(132-137) | 615.2885/<br>615.2865                          | 410.5283/<br>410.5269                          |                                                | 114-136 | 1229.5692/<br>1229.5652          |                      | x      |

**Supplementary Table S3.** Ligands tested with the four OBPs of *V. destructor*. Ligands are arranged in order of number of carbon atoms (No C). Tested ligands with each of the four proteins are marked by “v”.

| No C | Ligand                                    | OBP1                 | OBP2 | OBP4                | OBP5 |
|------|-------------------------------------------|----------------------|------|---------------------|------|
|      |                                           | Tryptophan quenching |      | Competitive binding |      |
|      | <i>Terpenoids</i>                         |                      |      |                     |      |
| 8    | Vanillin                                  | v                    | v    | v                   |      |
| 10   | Safranal                                  | v                    | v    | v                   | v    |
| 10   | Coniferyl aldehyde                        | v                    | v    | v                   | v    |
| 10   | (+) Carvone                               | v                    |      |                     |      |
| 10   | (-) Carvone                               | v                    |      |                     |      |
| 10   | Citral                                    |                      |      |                     | v    |
| 13   | $\beta$ -Ionone                           | v                    | v    | v                   | v    |
| 13   | Geranyl acetone                           |                      |      | v                   | v    |
| 15   | Farnesol                                  | v                    |      |                     | v    |
| 10   | Ocimene                                   |                      |      | v                   |      |
|      |                                           |                      |      |                     |      |
|      | <i>Aromatics</i>                          |                      |      |                     |      |
| 9    | Homovanillyl alcohol                      | v                    | v    | v                   | v    |
| 8    | Piperonyl alcohol                         | v                    |      |                     |      |
| 8    | Methyl p-hydroxybenzoate                  | v                    | v    | v                   | v    |
| 10   | Carvacrol                                 | v                    | v    |                     |      |
| 7    | 4-Methylcatechol                          | v                    | v    |                     |      |
| 13   | Methoxybiphenyl                           | v                    | v    |                     |      |
| 7    | Benzyl cyanide                            | v                    | v    |                     |      |
| 10   | Eugenol                                   | v                    |      | v                   | v    |
| 10   | Thymol                                    | v                    | v    |                     |      |
| 9    | 4-Isopropylphenol                         | v                    |      |                     |      |
| 11   | Methyleugenol                             | v                    | v    |                     |      |
| 9    | Methoxyvinylphenol                        | v                    | v    |                     |      |
| 11   | <i>p-tert</i> -Butylbenzaldehyde          | v                    | v    |                     | v    |
| 10   | Methoxycinnamaldehyde                     | v                    | v    |                     |      |
| 13   | Cyclamen aldehyde                         | v                    | v    |                     |      |
| 11   | Methoxyeugenol                            | v                    |      |                     |      |
| 14   | $\alpha$ -Pentylcinnamaldehyde            | v                    | v    | v                   | v    |
|      |                                           |                      |      |                     |      |
|      | <i>Acids, esters, aldehydes, alcohols</i> |                      |      |                     |      |
| 10   | Decanoic acid                             |                      |      |                     | v    |
| 10   | Decanal                                   |                      |      |                     | v    |
| 10   | 9-Ketodecenoic acid                       | v                    | v    | v                   | v    |
| 12   | Dodecanoic acid                           |                      |      | v                   |      |
| 12   | 1-Dodecanol                               |                      |      | v                   |      |
| 12   | Ethyl decanoate                           |                      |      |                     | v    |
| 16   | Z11-Hexadecenal                           |                      |      | v                   | v    |
| 16   | Ethyl myristate                           |                      |      |                     | v    |
| 18   | Ethyl palmitate                           |                      |      |                     | v    |
| 18   | Oleic acid                                |                      |      | v                   | v    |

**Supplementary Table S4.** Primers used for cloning and expression of varroa OBPs. Restriction sites are underlined, stop codons are in bold.

| Name         | Sequence                                          |
|--------------|---------------------------------------------------|
| VdesOBP1-Nde | CG <u>CATATG</u> GGCCCCTCAGGCACCTGC               |
| VdesOBP1-Eco | CG <u>GAAATTC</u> <b>CTA</b> AACCATGACTTTGATACC   |
| VdesOBP2-Nde | CG <u>CATATG</u> GGCCCCGAGGCCGAAA                 |
| VdesOBP2-Eco | CG <u>GAAATTC</u> <b>TTA</b> AGATACAACCTTAATACC   |
| VdesOBP3-Nde | CG <u>CATATG</u> GATACCGCCTCCGGAGA                |
| VdesOBP3-Eco | CG <u>GAAATTC</u> <b>TTA</b> CTTTGACGCCAACTTACA   |
| VdesOBP4-Nde | CG <u>CATATG</u> GATACTGCTACAGGGGATCA             |
| VdesOBP4-Eco | CG <u>GAAATTC</u> <b>CTA</b> GCCTTGAGCCTTTACGGC   |
| VdesOBP5-Nde | CG <u>CATATG</u> GGACCTCTGGCCAAGGA                |
| VdesOBP5-Eco | CG <u>GAAATTC</u> <b>TTA</b> CTGCGGGCCCGCTGCCATTG |

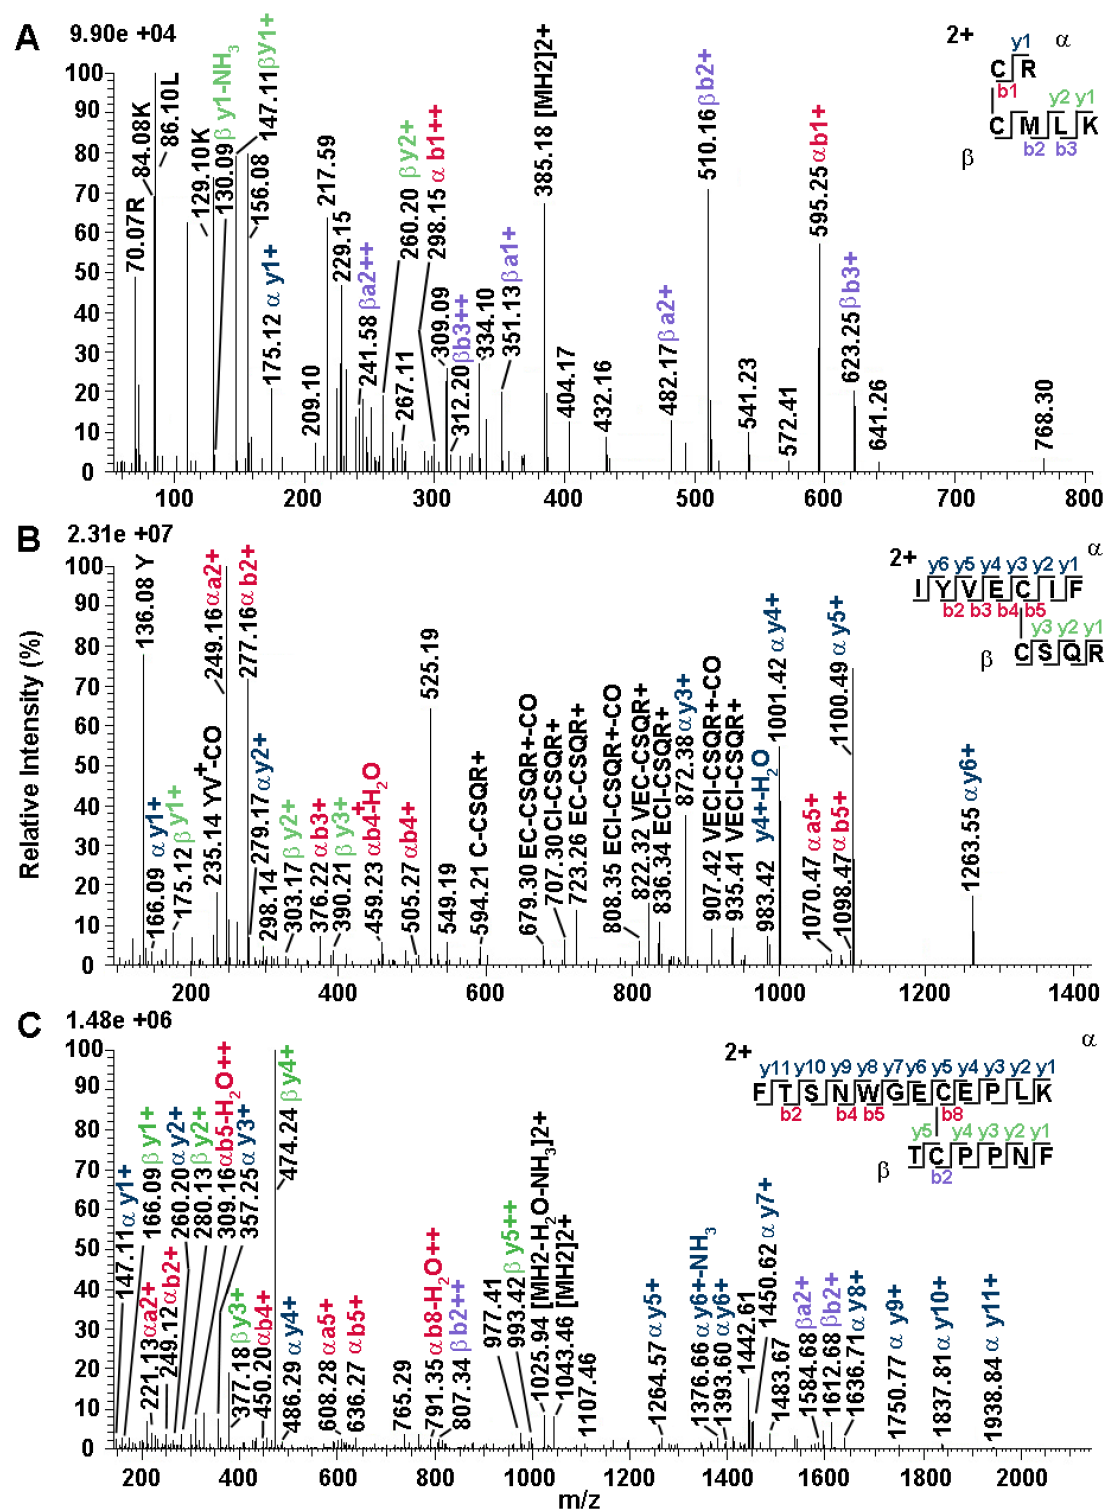

**Supplementary Figure S1. Fragmentation spectra of disulfide-bridged peptides identified in the tryptic-chymotryptic digest of *V. destructor* VdesOBP5 as revealed by nanoLC-ESI-Q-Orbitrap-MS/MS analysis.** The fragments are highlighted in different colours depending on peptides present in S-S-linked species, and on the corresponding b and y ion series. Complete data on disulfide-bridged peptides are reported in Supplementary Table S2 online.



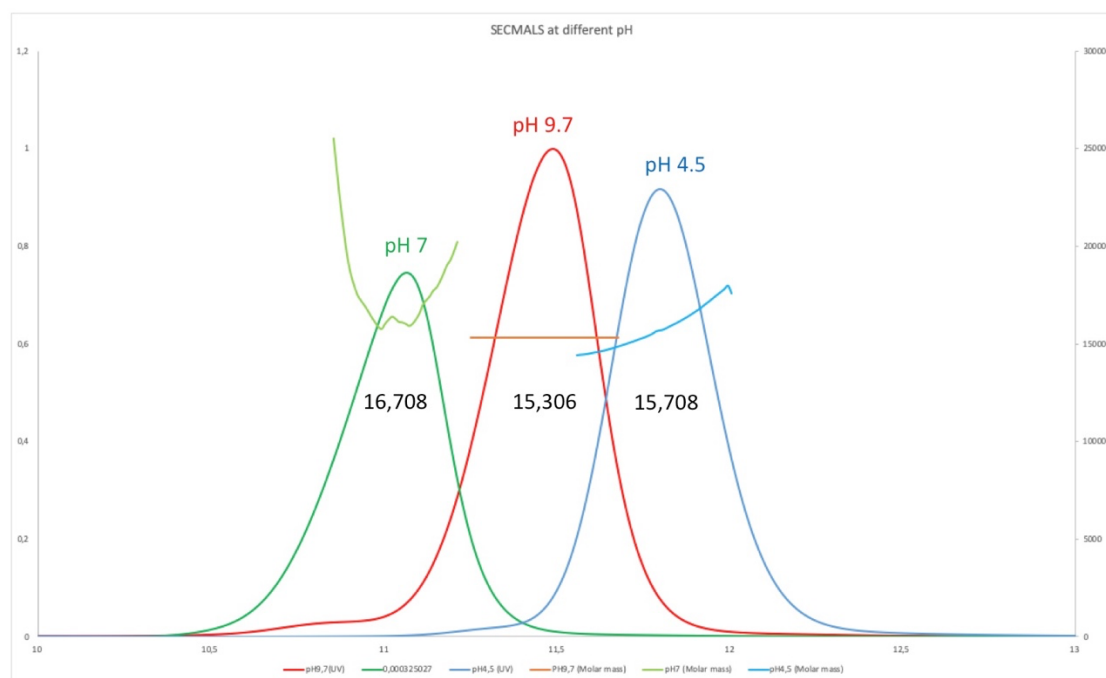

**Supplementary Fig. S2.** Analysis of VdesOBP1 aggregation in solution at different pH values, namely 4.5, 7.0 and 9.7, using HPLC with multi-angle laser light scattering /UV/ refractometry (SEC-MALLS-RI) coupled detectors (Wyatt, Santa-Barbara, USA). Mass values of 15,708 Da (pH 4.5, blue), 16,143 Da (pH 7.5, green) and 15,306 Da (pH 9.7, red) were measured.

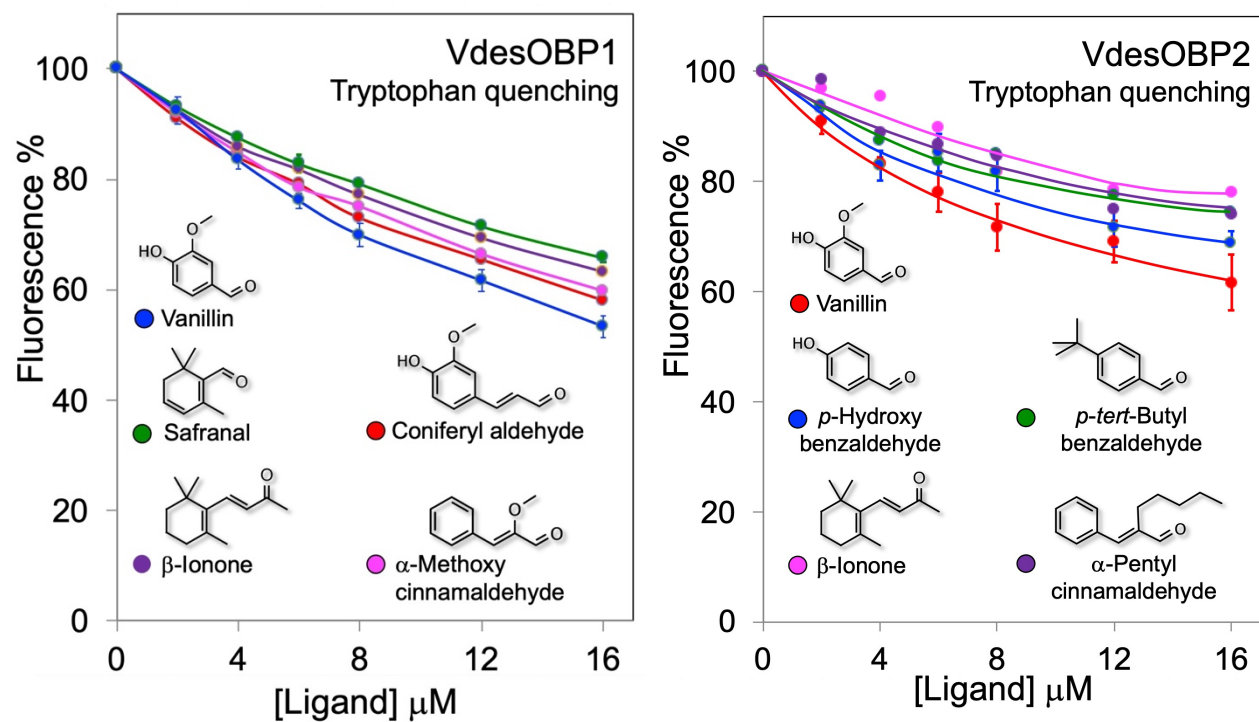

**Supplementary Fig. S3. Ligand-binding assays with VdesOBP1 and VdesOBP2.** With these two proteins we could not observe any blue shift in the fluorescence emission spectrum of 1-NPN in the presence of the protein. Therefore, we monitored the quenching of tryptophan intrinsic fluorescence caused by the entrance of a ligand in the binding pocket. Only chemicals capable of energy transfer were used in such assay. Tryptophan was excited at 295 nm and emitted fluorescence was measured around 335-340 nm.

**Supplementary Fig. S4.** Predicted phosphorylation sites (highlighted in blue) in the sequences of the five varroa OBPs. The six conserved cysteines are highlighted in yellow. The software used was NetPhos 3.1, which predicts serine, threonine and tyrosine potential phosphorylation sites in eukaryotic proteins. The predictions are relative to the following kinases: ATM, CKI, CKII, CaM-II, DNAPK, EGFR, GSK3, INSR, PKA, PKB, PKC, PKG, RSK, SRC, cdc2, cdk5 and p38MAPK.

Reference: Blom, N., Gammeltoft, S. & Brunak, S. Sequence- and structure-based prediction of eukaryotic protein phosphorylation sites. *J. Mol. Biol.* **294**, 1351-1362 (1999).

```

VdesOBP1 -----APQAPASATPAKVPVIEWGKCEQLK-PSESERTSKAAVVDKCLQSLPLPDPEK
VdesOBP2 -----GPEAGKPPTIEWGKCSQLK-PSDSERMTKAAVVEKCVQSLPLPEAGK
VdesOBP3 -----DTASGDHASDTSQFGKWRCLADK-LPAK----KREVFDECFI-----K
VdesOBP4 -----DTATGDHQPSNQFGRWRCLKSK-IPEN----KQPGMEACIN-----K
VdesOBP5 GPLAKDKSERITPKQTVVEEFFTSNWGCEPLKNPLVLPEISDAATWERCVRHIP-----

VdesOBP1 ATQQEIDKHRESVTTTCALKAEGWFDDEGVYKFDRARNEIKNKKLDSEVEEAVLLKHDAEQ
VdesOBP2 ASQAEIEKHREDVTTTCALKAEGWFDDEGVYKFDRARDEIKNKKLASDIETPVLEKHAECQ
VdesOBP3 PGGTDMNKFRRGLN-CVLTSD-----GLLKNHKVDLKKMSMTAASAGSPPELKKAYENCP
VdesOBP4 PGGTDMSKFRRGLG-CVLESY-----GIVNNHRVDLTKMRSSASLVTSPELKKAFMECP
VdesOBP5 LSPDQVEEALPNLSRCMLKVIGWVRANGNMNLTKYMDYLSQAGLDDKTLELTKTAHEKCS

VdesOBP1 KEATEKHD-DYINQVQLYQACMDYNI SQICGIKVMV-----
VdesOBP2 KEAGEKHTSDYIKQVQLYQACMDFNISQICGIKVVS-----
VdesOBP3 KD-----DKNTSEDRSIKCLIDHLEVDCKLASK-----
VdesOBP4 KD-----DKNSSLDRSIKVIDHLETS CSAVKAQG-----
VdesOBP5 QRALS DGSGDYKEQDKIYVECFRHFDKT C PPNFQAAVKQGYIVGITQISFVPRYDEVEV

VdesOBP5 ESDTDAETEGQAGPSVADATGEEAANDNANGSGGPQ

```
